# Supplementary material
Source: publisher site journal article supplement (https://www.degruyterbrill.com/publication/journal_key/CLS/downloadAsset/CLS_LaTeX_Template.zip)
Supplement: Supplementary file 1 [file CLS_LaTeX_Template.pdf › CLS_LaTeX_Template.pdf]

## Research Article

Corresponding Author\*, Second Author\*

# Article title

<https://doi.org/10.1515/cls-2022-0001>

received July 12, 2023; accepted August 27, 2023

**Abstract:** Please put abstract here.

**Keywords:** keywords, keywords

## 1 Introduction

## 2 Editorial Policy

### 2.1 Choice of reviewers

The Editor responsible for a given area of physics, turns to experts of the subject for opinion. Research articles and communications are reviewed by minimum two reviewers, review papers by at least three.

### 2.2 Suggestions from authors

Authors are requested to suggest persons competent to review their manuscript. However, please note that this will be treated only as a suggestion, the final selection of reviewers is exclusively the Editor's decision. The reviewers remain anonymous in any case.

The Editor is fully responsible for decision about the manuscript. The final decision, whether to accept or reject a paper, rests with him/her. The Managing Editor only communicates the final decision and informs the author about further processing.

### 2.3 Revised manuscript submission

When revision of a manuscript is requested, authors should return the revised version of their manuscript as soon as possible. Prompt action may ensure fast publication, if the paper is finally accepted for publication in Curved and Layered Structures. If it is the first revision of an article authors need to return their revised manuscript within 60 days. If it is the second revision authors need to return their revised manuscript within 14 days. If these deadlines are not met, and no specific arrangements for completion have been made with the Editor, the manuscript will be treated as a new one and will receive a new identification code along with a new registration date.

### 2.4 Final proofreading

Authors will receive a PDF file with the edited version of their manuscript for final proofreading. This is the last opportunity to view an article before its publication on the journal's web site. No changes or modifications can be introduced once it is published. Thus authors are requested to check their proof pages carefully against manuscript within 3 working days and prepare a separate document containing list of all the changes that should be introduced. Authors are sometimes asked to provide additional comments and explanations in response to remarks and queries from the language and technical editors. In case the authors do not deliver the list of corrections to proofs in the requested time the manuscript will be published as is.

### 2.5 Reprints

Because the journal is published in an Open Access model, and has no printed version, the authors receive no reprints.

\* **Corresponding author: Corresponding Author**, Corresponding Author's affiliation; Second Author's affiliation, e-mail: email@email.edu

\* **Corresponding author: Second Author**, , email@email.edu

## 2.6 Erratum

If any errors are detected in the published material they should be reported to the Managing Editor. The corresponding authors should send appropriate corrected material to the Managing Editor via email. This material will be considered for publication in form of erratum in the earliest available issue of Curved and Layered Structures.

## 2.7 Copyright

All authors retain copyright, unless – due to their local circumstances – their work is not copyrighted. The non-commercial use of each article will be governed by the Creative Commons Attribution-NonCommercial-NoDerivs license. The corresponding author grants De Gruyter Open the exclusive license to commercial use of the article, by signing the License to Publish. Scanned copy of license should be sent by e-mail to the Managing Editor of the journal, as soon as possible.

# 3 Paper writing guide

## 3.1 Paper elements

1. title page with:
  - (a) title (short title),
  - (b) full name(s) of author(s),
  - (c) name and address of workplace(s),
  - (d) personal e-mail address(es),
2. abstract,
3. up-to five keywords,
4. text,
5. reference lists.

### 3.1.1 Abstract

An abstract must accompany every article. It should be a brief summary of the significant items of the main paper. An abstract should give concise information about the content of the core idea of your paper. It should be informative and not only present the general scope of the paper but also indicate the main results and conclusions. An abstract should not normally exceed 200 words. It should not contain literature citations or allusions to the tables or

illustrations. All non-standard symbols and abbreviations should be defined.

In combination with the title and key-words, the abstract is an indicator of the content of the paper. Authors should remember that on-line systems rely heavily on the content of titles and abstracts to identify articles in electronic bibliographic databases and search engines. They are therefore requested to take great care in preparing these elements.

### 3.1.2 Text

Text

# 4 General rules for writing

- use simple and declarative sentences, avoid long sentences, in which the meaning may be lost by complicated construction;
- be concise, avoid idle words;
- make your argumentation complete; use commonly understood terms; define all non-standard symbols and abbreviations when you introduce them;
- explain all acronyms and abbreviations when they first appear in the text;
- use all units consistently throughout the article;
- be self-critical as you review your drafts.

# 5 Structure of a paper

Research papers and review articles should follow a strict structure. Generally a standard scientific paper is divided into:

- introduction: you present the subject of your paper clearly, you indicate the scope of the subject, you present the goals of your paper and finally the organization of your paper;
- main text: you present all important elements of your scientific message;
- conclusion: you summarize your paper.

Experimental part and/or calculations should be presented in sufficient details to enable reader to repeat the original work.

## 6 Footnotes/End-notes/ Acknowledgments

We encourage authors to restrict the use of footnotes. If necessary, please make end-notes rather than footnotes. Allowable footnotes/end-notes may include:

- the designation of the corresponding author of the paper;
- the current address of an author (if different from that shown in the affiliation);
- traditional footnote content.

## 7 Tables

Authors should use tables only to achieve concise presentation, or where the information cannot be given satisfactorily in other ways. Tables should be numbered consecutively using Arabic numerals and referred to in the text by number. Each table should have an explanatory caption which should be as concise as possible.

## 8 Figures

Authors may use line diagrams and photographs to illustrate theses from their text. The figures should be clear, easy to read and of good quality. Styles and fonts should match those in the main body of the article. All figures must be mentioned in the text in consecutive order and be numbered with Arabic numerals (Figures 1 and 2)



**Figure 1:** A figure caption should be placed **below** the figure.

## 9 Typesetting

Type main text in roman (upright) font. The chemical symbols and compounds, units of measure, most multi-letter operators and functions should be written in roman upright as well. The variables, constants, symbols for particles, most single-letter operators, axes and planes, channels, types (e.g.,  $n$ ,  $p$ ), bands, geometric points, angles, lines,



**Figure 2:** A figure caption for Figure 2.

chemical prefixes, symmetry designations, transitions, critical points, color centers, quantum-state symbols in spectroscopy, and most single-letter abbreviations should be written in roman italic. Boldface roman type is reserved for indicating vectors and in some special cases matrices.

## 10 Mathematical symbols

The multiplication signs are reserved for a vector product ( $\mathbf{A} \times \mathbf{B}$ ) and simple dot product ( $\mathbf{A} \cdot \mathbf{B}$ ). The only exception are numbers expressed in scientific notation ( $9.7 \times 10^3$  MeV).

## 11 Units

Units and dimensions should be expressed according to the metric system and SI units. This system is based on: meter (m), second (s), kilogram (kg), ampere (A), kelvin (K), mole (mol), and candela (cd). Most units are spaced off from the number, e.g. 12 mV. The only exceptions are:

1%, 1‰, 1°C, 1°, 1', 1″.

Decimal multiples or sub-multiples of units are indicated by the use of prefixes

$\mu = 10^{-6}$ ,  $m = 10^{-3}$ ,  $c = 10^{-2}$ ,  $d = 10^{-1}$ ,  $da = 10^1$ ,  $h = 10^2$ ,  $k = 10^3$ ,  $M = 10^6$ ,  $G = 10^9$ , etc.

Compound units are written as

4221.9 J kg<sup>-1</sup> K<sup>-1</sup> or 4221.9 J/(kg K),

with a thin space between unit parts.

Authors should indicate precisely in the main text **where tables and figures should be inserted**, if these elements are given at the end in the original version of the manuscript (or supplied in separate files). If this information is not provided along with the manuscript, we will assume that the figures and/or tables should be insert at the closest position to first reference to them in the published paper.

## 12 Multimedia and images

Authors can attach files in most popular formats, including (for example):

- images in BMP, GIF, JPEG formats,
- multimedia files in MPEG or AVI formats.

However please keep to file types that are read by standard media players (e.g. RealPlayer, Quicktime, Windows Media Player) and/or standard office applications (Adobe Acrobat Reader, Microsoft Office etc.).

Your attachments may be accessible through links to external locations or to our internal locations (if you choose the second option, please remember to send us your attachments).

Please remember that your images, video and animation clips are intended for Internet use and we need to consider the needs of users with slow Internet connections. Please try to minimize file sizes by using a lower resolution or number of colors for images and animations (as long as the material is still clear). To help you in formatting your images (including tables and figures) or multimedia files, please submit your paper with separate attachments, which are used in your paper.

## 13 English language

Journal is published only in English. Make sure that your manuscripts are clearly and grammatically written. Please note that authors who are not native-speakers of English can be provided with help in rewriting their contribution in correct English. Try to prepare your manuscript in an easily readable style; this will help avoid severe misunderstandings which might lead to rejection of the paper.

### 13.0.1 Reference list

A complete reference should give the reader enough information to find the relevant article. All authors (unless there are six or more) should be named in the citation. If there are six or more, list the name of the first one followed by “et al”. Please pay particular attention to spelling, capitalization and punctuation here. Completeness of references is the responsibility of the authors. A complete reference should comprise the following:

## 14 Reference to an article in a journal

Elements to cite:

Surname, Author's Initials. year of publication, – if more authors, see examples below, Title of journal – abbreviated according to the ISI standards<sup>1</sup>, volume number, page or article number. Please supply DOI or URL for e-version of the papers.

## 15 Reference to a book

Elements to cite:

Surname, Author's Initials. Year of publication, Title, Edition – if not the first, Publisher, Place of publication.

## 16 Reference to a part/ chapter book

Elements to cite:

Surname, Author's Initials. Year of publication, Book Title, In: Editor's Initials. Editor's Surname (Ed.), Edition – if not the first, Publisher, Place of publication, page number.

## 17 Reference to a preprint

Elements to cite:

Surname, Author's Initials., arXiv:preprint-number and version.

## 18 Reference to a conference proceedings

Elements to cite:

Surname, Author's Initials. year of publication, In: Editor's Surname Editor's Initials. (Ed.), Conference (date, place (town and country) of conference), Publisher, page number.

<sup>1</sup> [http://images.isiknowledge.com/WOK46/help/WOS/0-9\\_abrvjt.html](http://images.isiknowledge.com/WOK46/help/WOS/0-9_abrvjt.html)

## 19 Reference to a thesis

Elements to cite:

Surname, Author's Initials. year of publication, D.Sc./Ph.D./M.Sc./B.Sc. thesis, University (town, country).

## 20 Reference to an article in a newspaper

Elements to cite:

Surname, Author's Initials., Newspaper Title, date of publication page number.

## 21 Reference to a patent

Elements to cite:

Originator, Series designation which may include full date.

## 22 Reference to a standard

Elements to cite:

Standard symbol and number, Title.

Please add language of publication for materials which are not written in English. Indicate materials accepting for publications by adding "(in press)". Please avoid references to unpublished materials, private communication and web pages.

You should make sure the information is correct so that the linking reference service may link abstracts electronically. For the same reason please separate each reference from the others.

Before submitting your article, please ensure you have checked your paper for any relevant references you may have missed.

Please use the following style for the reference list:

Published Papers:

- Kulig, P., Zabel, B.A., Dubin, G., Allen, S.J., Ohyama, T., Potempa, J., et al. **2007**, *J. Immunol.*, 178, 3713-3720.
- Kulig, P., Zabel, B.A., Dubin, G., Allen, S.J., Ohyama, T., Potempa, J., et al. **2007**, *J. Immunol.*, 178, 3713-3720 (in Polish).

Accepted Papers:

- Kulig, P., Zabel, B.A., Dubin, G., Allen, S.J., Ohyama, T., Potempa, J., et al., *J. Immunol.*, (in press), DOI: 12.3412/01
- Kulig, P., Zabel, B.A., Dubin, G., Allen, S.J., Ohyama, T., Potempa, J., et al., *J. Immunol.*, (in press, in Polish), DOI: 12.3412/01

Electronic Journal Articles:

- Dionne, M.S., Schneider, D.S. **2002**, *Genome Biol.*, <http://genomebiology.com/2002/3/4/reviews/1010>

Books:

- Sambrook, J., Russell, D.W. **2001**, Molecular cloning - a laboratory manual, 3rd ed., *Cold Spring Harbor Laboratory Press*, Cold Spring Harbor.

Book chapters:

- Sambrook, J. **2001**, Cloning and sequencing, In: Sambrook J., Russell D.W. (Eds.), 3rd ed., *Cold Spring Harbor Laboratory Press*, Cold Spring Harbor, 500-528.

Theses:

- Agutter, A.J. **1995**, Analysis of sigma factors in *S. aureus*, PhD thesis, *Edinburgh University*, Edinburgh, UK.

Conference proceedings:

- Smith, J., Brown, P. **2007**, In: Scott M. (Ed.), Proceedings of Biochemical Society Conference (11-13 July 2007, Warszawa, Poland), *Versita Warsaw*, 1335-1791.

Newspaper articles:

- Sherwin, A., The post-genomic era, *The Times*, 13 July **2007**, 1-2.

References should be listed in the alphabetical order by the surname of author(s) and the date of publication – with no comma before the date, according to these examples: articles by three or more authors are cited by the first author followed by "et al." and the date (Kulig et al. 2007); articles by two authors are cited by both last names joined by an ampersand (Smith & Brown 2007); and articles by a single author are cited by the last name and the date of publication [1].

### 22.1 Figures and figure legends

Authors may use photographs, schemes, diagrams, line graphs and bar charts to illustrate their findings. Figures included with online submissions should be suitable for onscreen viewing and desktop printing. High resolution

images should be provided on request or on manuscript acceptance. The figures and their lettering should be clear and easy to read, e.g., no labels should be too large or too small. Photomicrographs should include a scaled bar and indicate the size. We remind authors that it is not acceptable scientific conduct to modify any separate element within an image (adjustments of the entire image in brightness, contrast and color balance are justified only if they do not misrepresent the original, observed data). Composite figures composed of grouped images such as insets from different fields or separate parts of gels must be explained in the figure legend and differentiated by use of dividing lines or other means to make composites unambiguous. Figures should be numbered consecutively using Arabic numerals and referred to in the text by number. Figure legends should follow the main text, each on a separate page. Each figure legend should have a concise title and should provide enough information so that the figure is understandable without frequent reference to the text. It should inform the reader of key aspects of the figure, but the figure should also be discussed in the text. The legend should be succinct, while still explaining all symbols and abbreviations. Avoid lengthy descriptions of methods.

## 22.2 Tables and table captions

Tables must include enough information to warrant table format and should be used only where information cannot be presented in the text. Tables should be typed as text, using either 'tabs' or a table editor for layout; please do not use graphics software to create tables. Tables occupying more than one printed page should be avoided, if possible; larger tables can be published as an appendix. Do not use picture elements, text boxes, tabs, or returns in tables. Tables that contain artwork, chemical structures, or shading must be submitted as illustrations. Tables should be numbered consecutively using Arabic numerals and referred to in the text by number. Table legends should follow the main text, each on a separate page. Each table should have an explanatory caption which should be as concise as possible. The headings should be sufficiently clear so that the meaning of the data is understandable without reference to the text. Footnotes can be used to explain abbreviations but should not include detailed descriptions of the experiment. Citations should be indicated using the same style as outlined above.

## 22.3 Equations

In-line equations should be typed as text. The use of graphics programs and 'equation editors' should be avoided.

## 22.4 Abbreviations

Please keep abbreviations to a minimum. Standard abbreviations of journal names according to the ISI standards (see <http://library.caltech.edu/reference/abbreviations/>). Non-standard abbreviations should not be used unless they appear at least three times in the text. List all non-standard abbreviations, acronyms and symbols in alphabetical order, along with their expanded form, at the end of the text. Define them as well upon first use in the text.

## 22.5 Supplemental material

We encourage authors to submit essential supplementary files that additionally support the authors' conclusions along with their manuscripts (the principal conclusions should be fully supported without referral to the supplemental material). Supplemental material will always remain associated with its article and is not subject to any modifications after publication. The decision to publish the material with the article if it is accepted will be made by the Editor. Supporting files of no more than 10 MB in may be submitted in a variety of formats, but should be publication-ready, as these files will be published exactly as supplied. Material must be restricted to large or complex data sets or results that cannot be readily displayed because of space or technical limitations. Material that has been published previously is not acceptable for posting as supplemental material.

Supporting files should fall into one of the following categories:

- Dataset
- Additional Figure or Table
- Text
- Protocol
- Multimedia-Audio/Video/Animations (AVI, MPEG, WAV, Quicktime, animated GIF or Flash)

If the software required for users to view/use the supplemental material is not embedded in the file, you are urged to use shareware or generally available/easily accessible programs. To prevent any misunderstandings, we

request that authors submit a text file (instruction.txt) containing a brief instruction on how to use the files supplied. All supporting information should be referred to in the manuscript, with titles (and, if desired, legends) for all files listed under the heading 'Supporting Information'.

## 22.6 Nomenclature

We strongly recommend the use of correct and established nomenclature wherever possible. Always report numerical data (length, weight, and volume) in the appropriate SI units. Please refer to International Union of Pure and Applied Chemistry (IUPAC) recommendations available for standard metric units. For these units and for molarity, use the prefixes ( $p = 10^{-12}$ ,  $n = 10^{-9}$ ,  $\mu = 10^{-6}$ ,  $m = 10^{-3}$ ,  $c = 10^{-2}$ ,  $d = 10^{-1}$ ,  $h = 10^2$ ,  $k = 10^3$ ,  $M = 10^6$ ,  $G = 10^9$ , etc.). Use  $\mu\text{g/ml}$  or  $\mu\text{g/g}$  in place of the ambiguous ppm. When fractions are used to express units, it is preferable to use whole units, such as 'g' or 'min', in the denominator instead of fractional or multiple units, such as  $\mu\text{g}$  or 10 min (for example 'pmol/min' is preferable to 'nmol/10 min', and ' $\mu\text{mol/g}$ ' is preferable to 'nmol/ $\mu$  g'). It is also preferable that an unambiguous form such as exponential notation be used; for example, ' $\mu\text{mol g}^{-1} \text{min}^{-1}$ ' is preferable to ' $\mu\text{mol/gmin}$ '. Units of temperature are presented in degrees centigrade (i.e.  $37^\circ\text{C}$ ).

## 22.7 Formatting and typesetting

All pages must be numbered consecutively. The whole text (including legends, footnotes, and references) should be formatted double-spaced with no hyphenation and automatic word-wrap (no hard returns within paragraphs). Please type your text consistently, e.g. take care to distinguish between '1' (one), 'I' (capital I) and 'l' (lower-case L) and '0' (zero) and 'O' (capital O), etc. Manuscript pages should have line numbers. The font size should be no smaller than 12 points.

Footnotes and endnotes should be avoided. Allowable footnotes/endnotes may include: the designation of the corresponding author of the paper, the current address of an author (if different from that shown in the affiliation), abbreviations and acronyms.

Do not create symbols as graphics or use special fonts that are external to your word processing program; use the "insert symbol" function. Indicate paragraph lead-ins in bold type and italicize any words that should appear in

italics. All Latin names should be italicized, including species names and common structures such as: *et al.*; *in vivo*; *in vitro*; *ex vivo*; *in silico*; etc.; *de novo*; *a priori*; *ab initio*; *vice versa*; *in situ*; *ad hoc*; *sensu stricto*; i.e.; *ca.* /*circa*; *n.b.* /*nota bene*. Decimal multiples or submultiples of units are indicated by the use of prefixes. There should be a single space between most units and the corresponding number; the only exceptions are: 1%, 1‰,  $1^\circ\text{C}$ ,  $1'$ ,  $1''$ .

## 23 Distribution of materials and data

The publication of an article in the journal is subject to the understanding that authors will make all data and associated protocols available to readers on request. The Methods section should include details of how materials and information may be obtained. In cases of dispute, authors may be required to make any primary data available to the Managing Editor.

## 24 Copyright

All authors retain copyright, unless – due to their local circumstances – their work is not copyrighted. The non-commercial use of each article will be governed by the Creative Commons Attribution-NonCommercial-NoDerivs license. The corresponding author grants De Gruyter Open the exclusive license to commercial use of the article, by signing the License to Publish. Scanned copy of license should be sent by e-mail to the Editor of the journal, as soon as possible.

## 25 Outline of the production process

Once an article has been accepted for publication, the manuscript files are transferred into our production system to be language-edited and formatted. Language and technical editors reserve the privilege of editing manuscripts to conform with the stylistic conventions of the journal. Once the article has been typeset, PDF proofs are generated so that authors can approve all editing and layout.

## 25.1 Electronic proofs

Proofreading should be carried out once a final draft has been produced. Since the proofreading stage is the last opportunity to correct the article to be published, the authors are requested to make every effort to check for errors in their proofs before the paper is posted online. Please note that only essential changes can be made at this stage and extensive corrections, additions, or deletions will not be allowed. Limit changes to correction of spelling errors, incorrect data, grammatical errors, and updated information for references to articles that have been submitted or are in press. If URLs have been provided in the article, recheck the sites to ensure that the addresses are still accurate and the material that you expect the reader to find is indeed there. Important new information that has become available between acceptance of the manuscript and receipt of the proofs may be inserted into the proof with the permission of the editor. Additionally, authors may be asked to address remarks and queries from the language and/or technical editors. Queries are written only to request necessary information or clarification of an unclear passage or to draw attention to edits that may have altered the sense. Please note that language/technical editors do not query at every instance where a change has

been made. It is the author's responsibility to read the entire text, tables, and figure legends, not just items queried. Major alterations made will always be submitted to the authors for approval.

Manuscripts submitted under multiple authorship are published on the assumption that the final version of the manuscript has been seen and approved by all authors. The Corresponding author will receive e-mail notification when a downloadable PDFfile is available and should return comments on the proofs within a maximum of 3 days of receipt. Comments should be e-mailed to Managing Editor. Please note that they should not be faxed, nor mailed or sent by a courier service to the Editorial Office.

:

## References

- [1] Schmidt M. Bull. Astron. Inst. Netherlands. 1956;13:15–41.
- [2] Schmidt M. Galactic structure. . In: Blaauw A, Schmidt M, editors, Chicago & London: University of Chicago Press; 1965, pp. 513–530.
