# Supplementary material
Source: publisher site journal article supplement (https://www.degruyterbrill.com/publication/journal_key/CLS/downloadAsset/CLS_LaTeX_Template.zip)

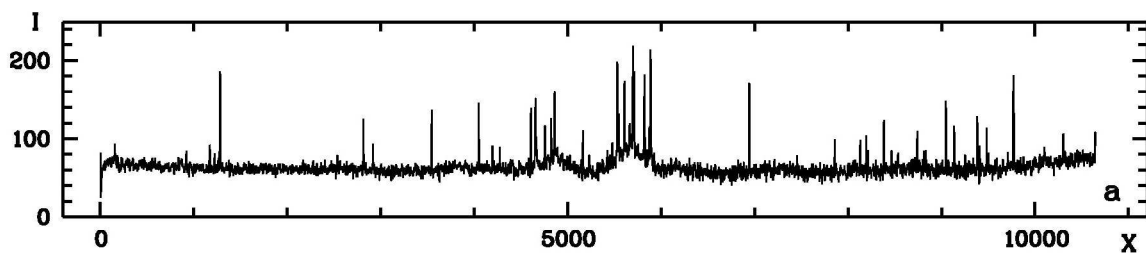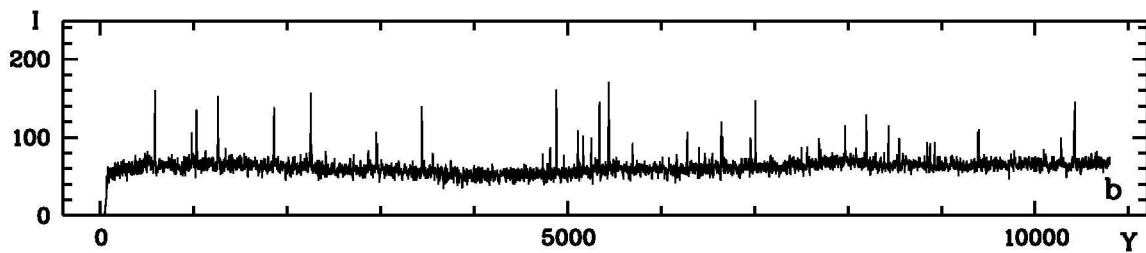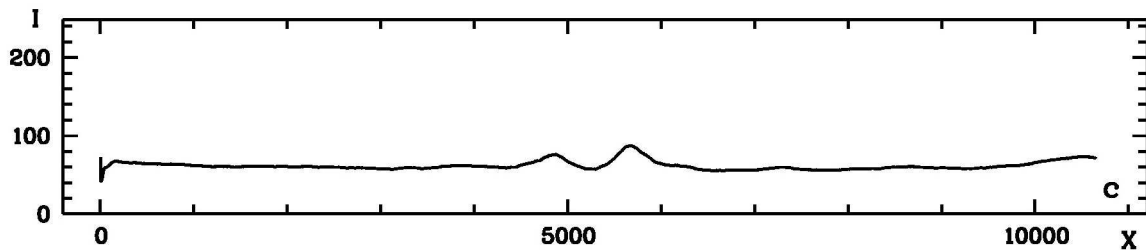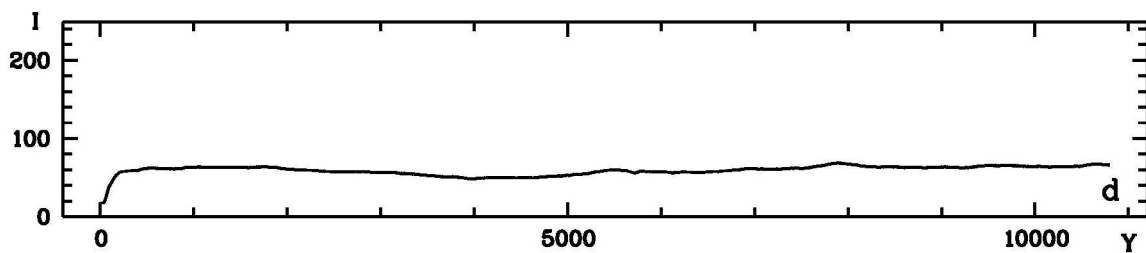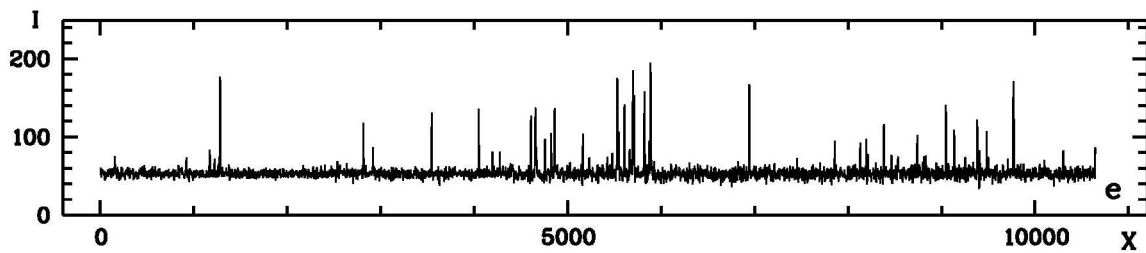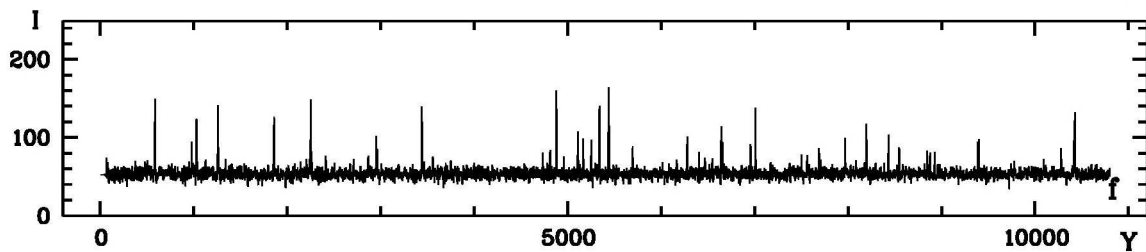

Supplement: Supplementary file 2 [file fig1x.pdf › image/fig1x.pdf]

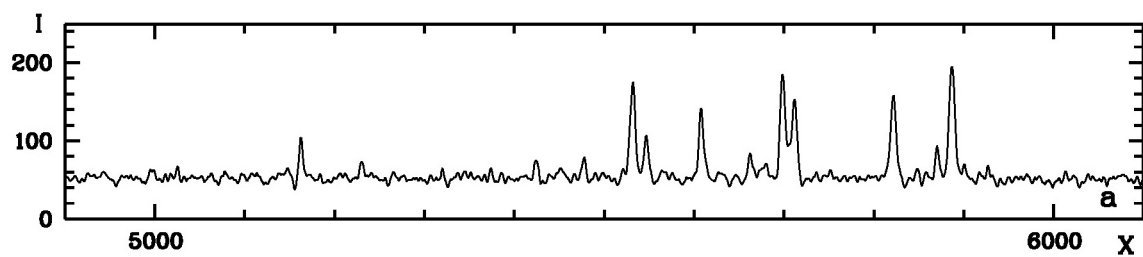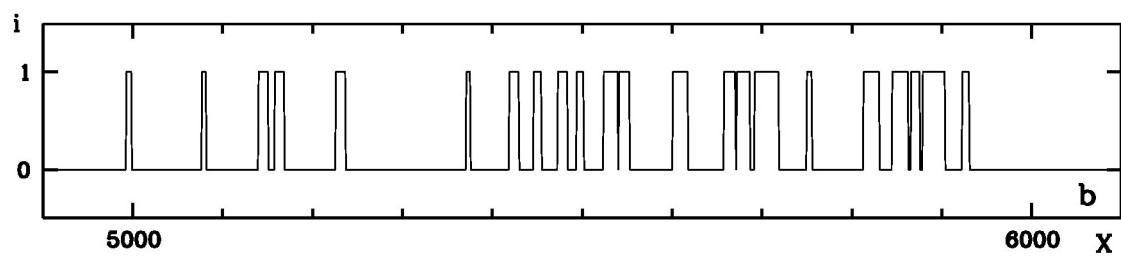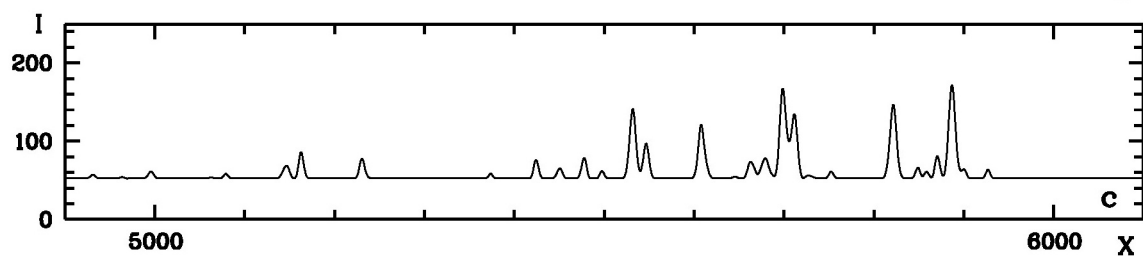

Supplement: Supplementary file 3 [file fig2x.pdf › image/fig2x.pdf]

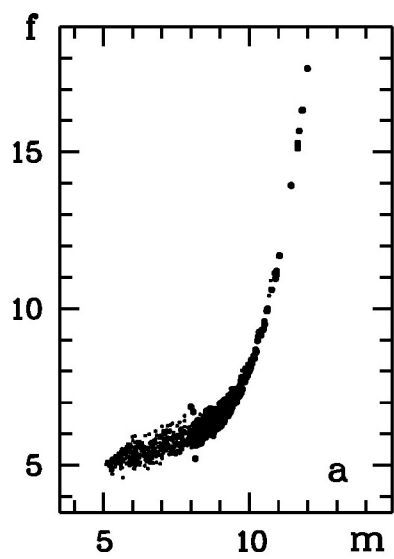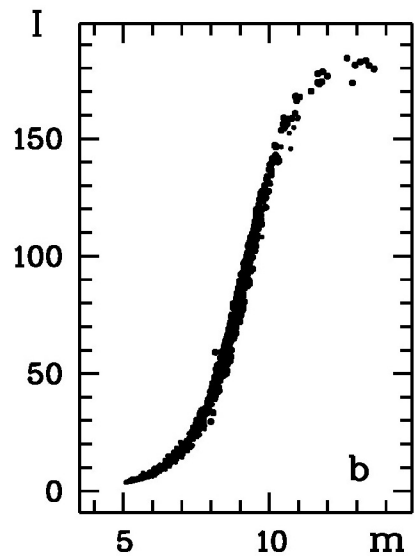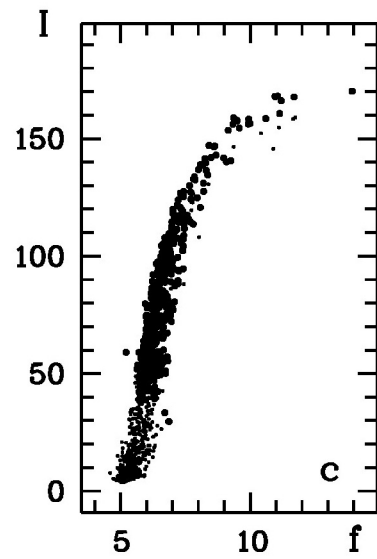

Supplement: Supplementary file 4 [file fig3x.pdf › image/fig3x.pdf]

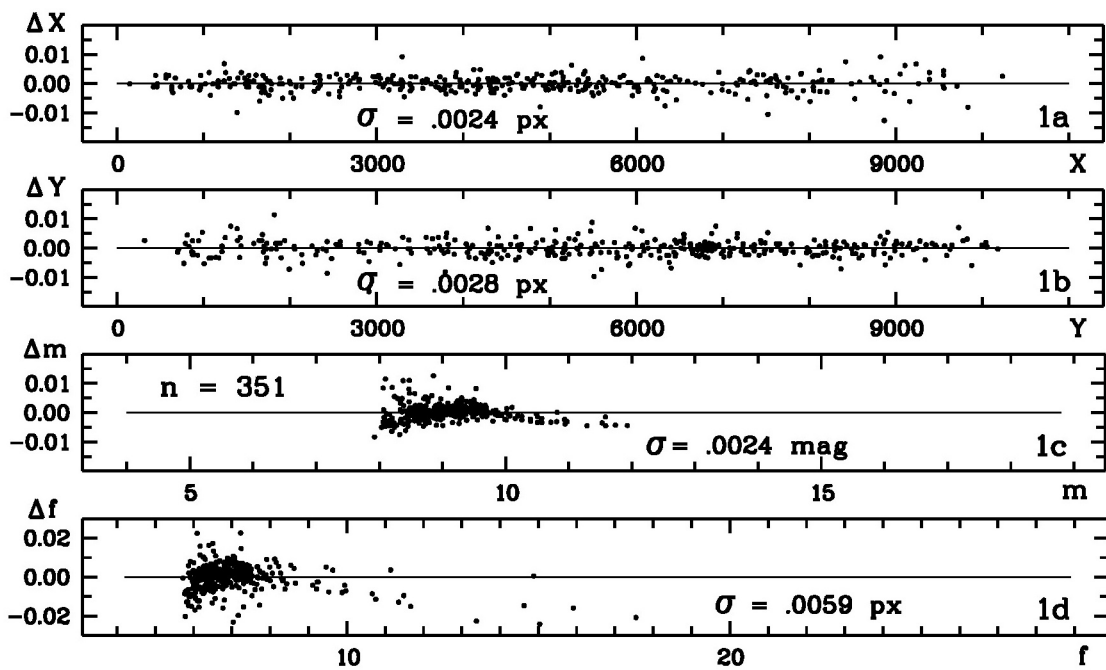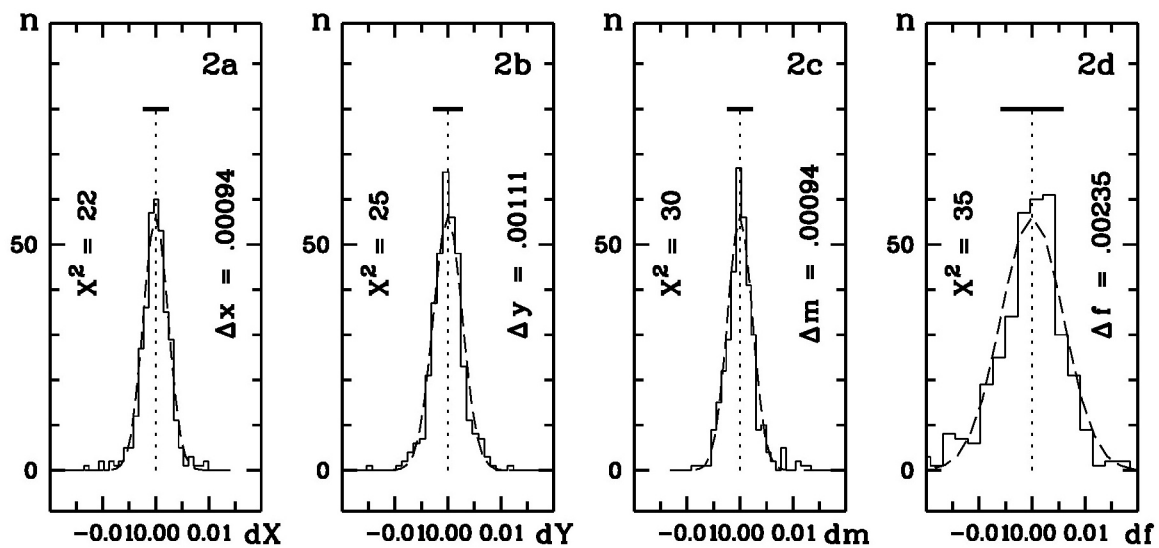

Supplement: Supplementary file 5 [file fig4x.pdf › image/fig4x.pdf]

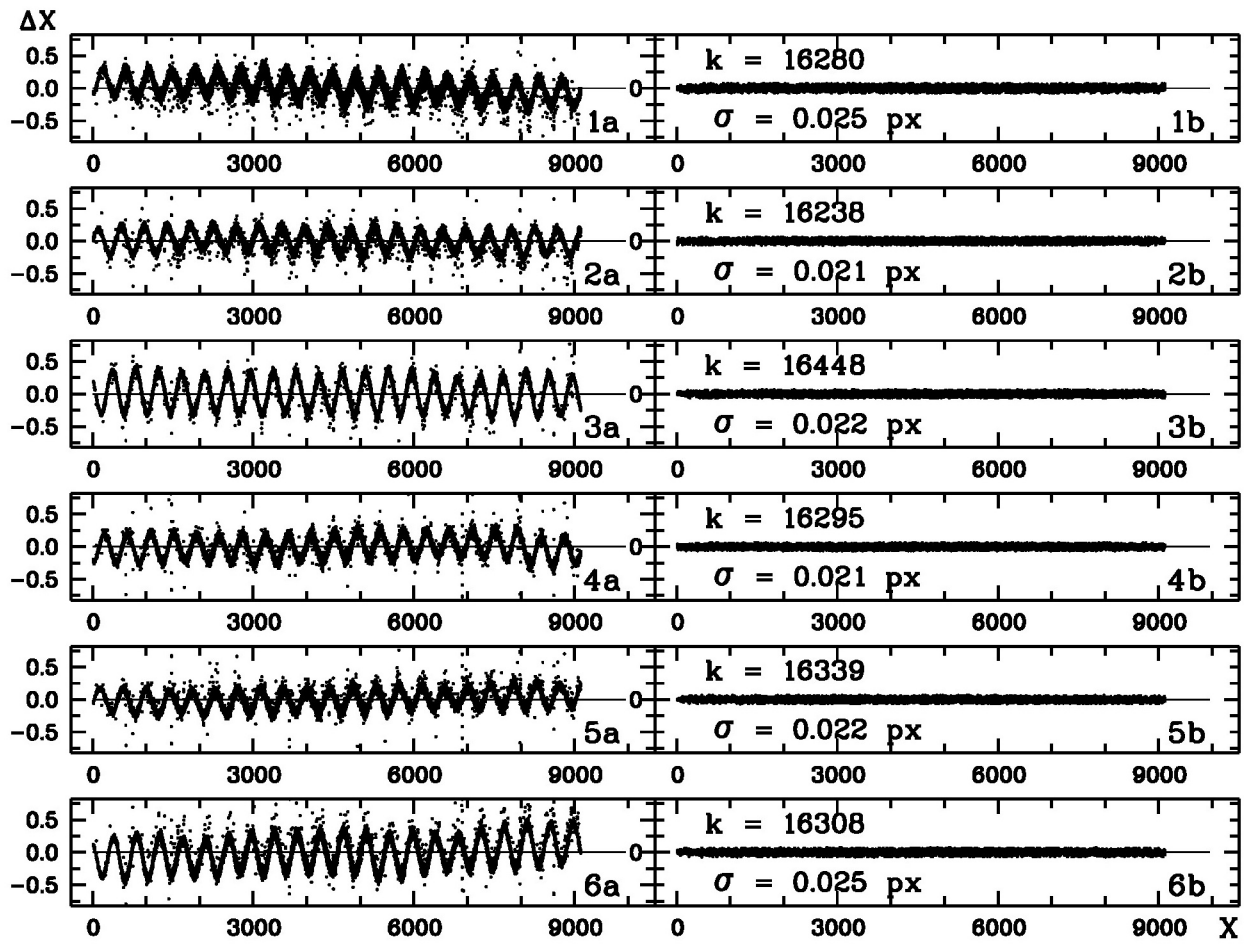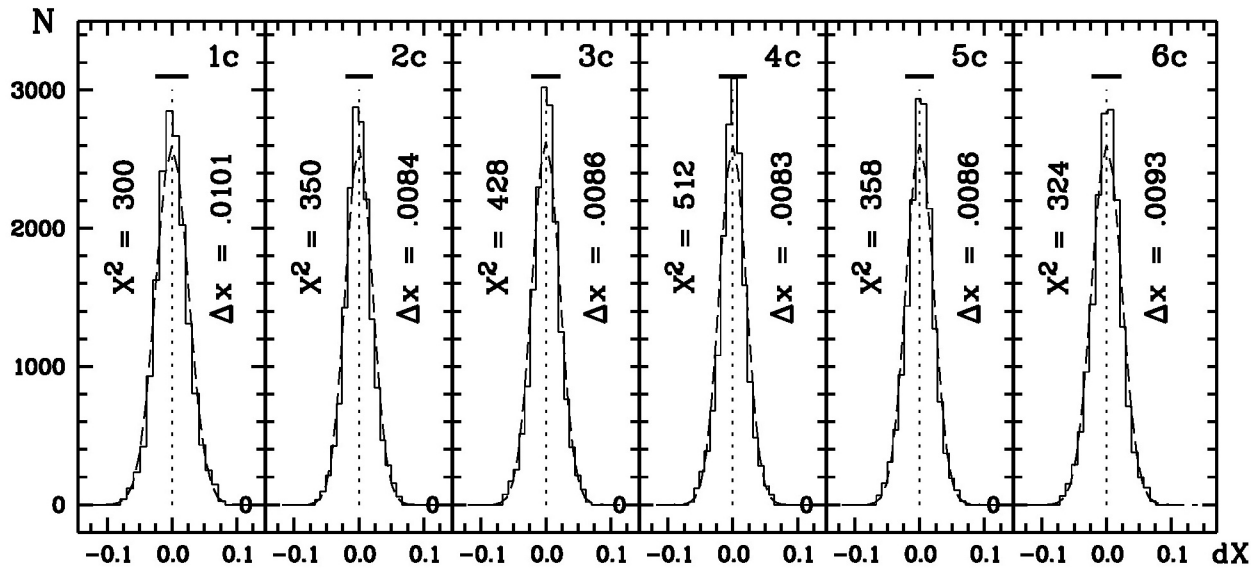

Supplement: Supplementary file 6 [file fig5ax.pdf › image/fig5ax.pdf]

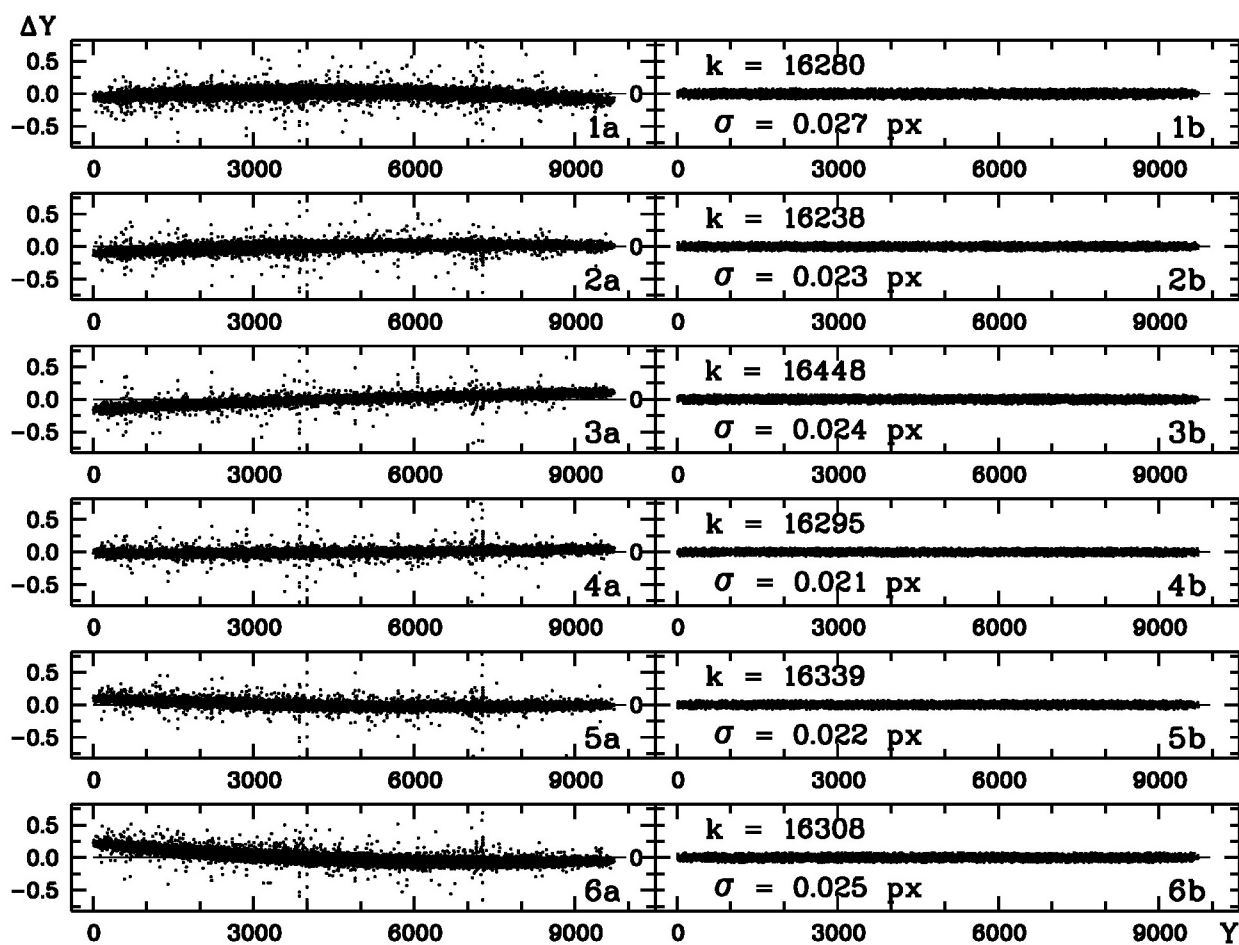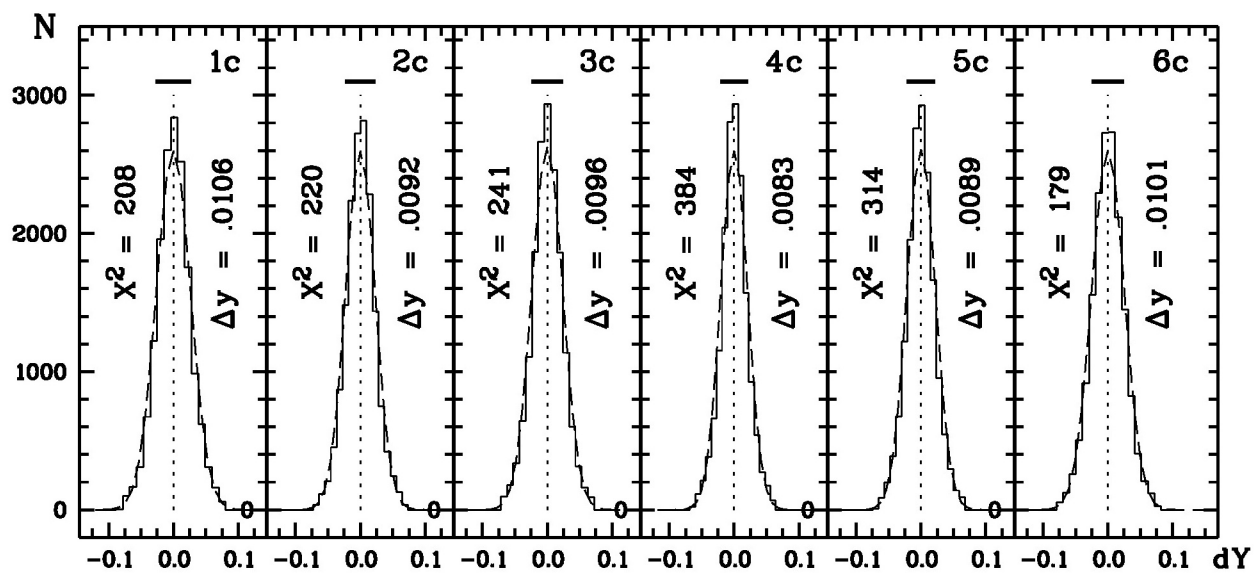

Supplement: Supplementary file 7 [file fig5bx.pdf › image/fig5bx.pdf]

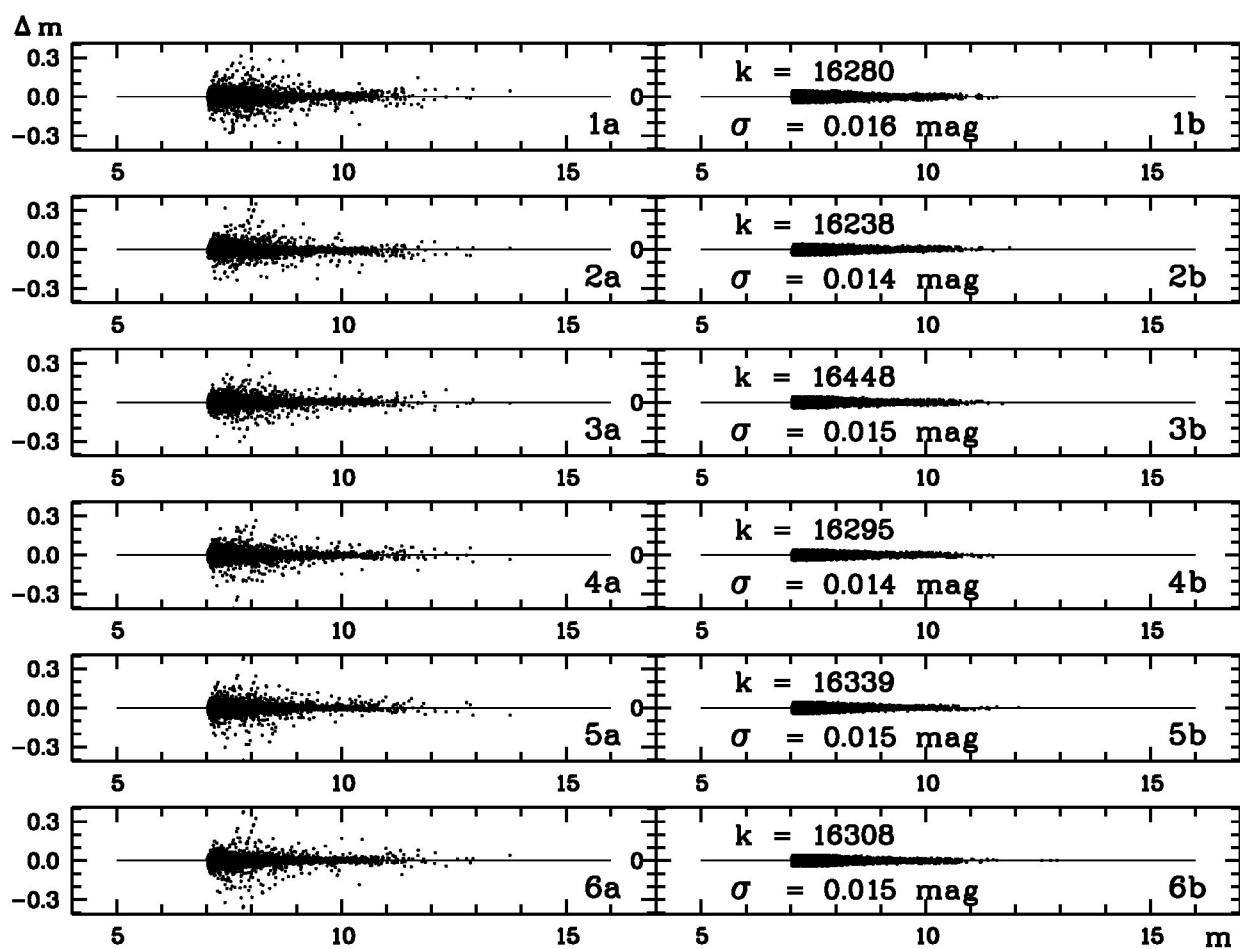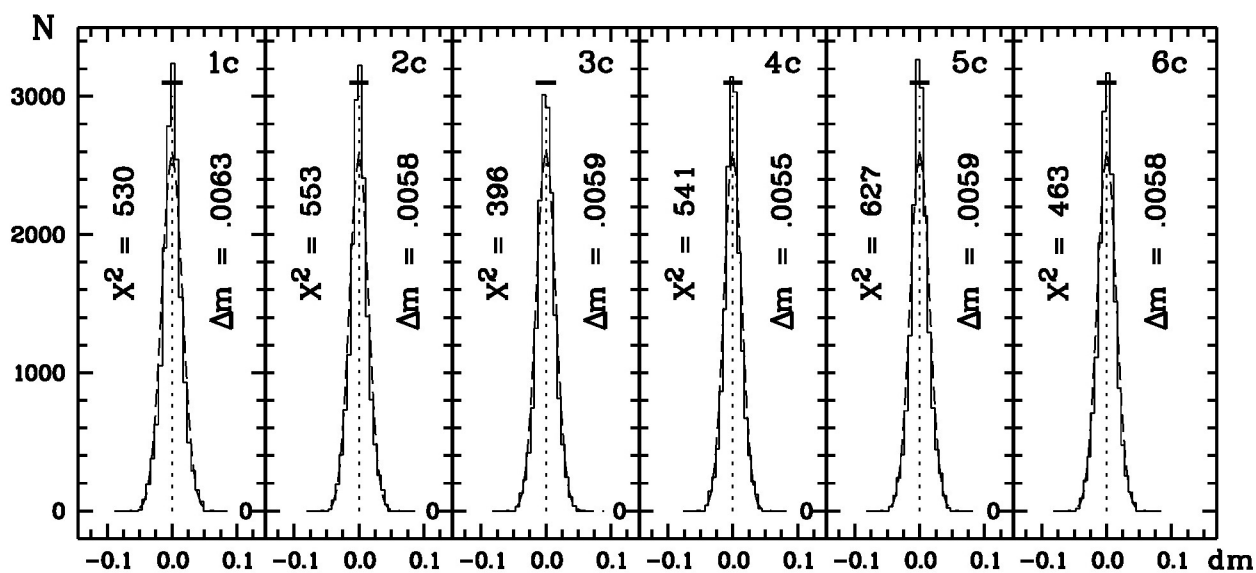

Supplement: Supplementary file 8 [file fig5cx.pdf › image/fig5cx.pdf]

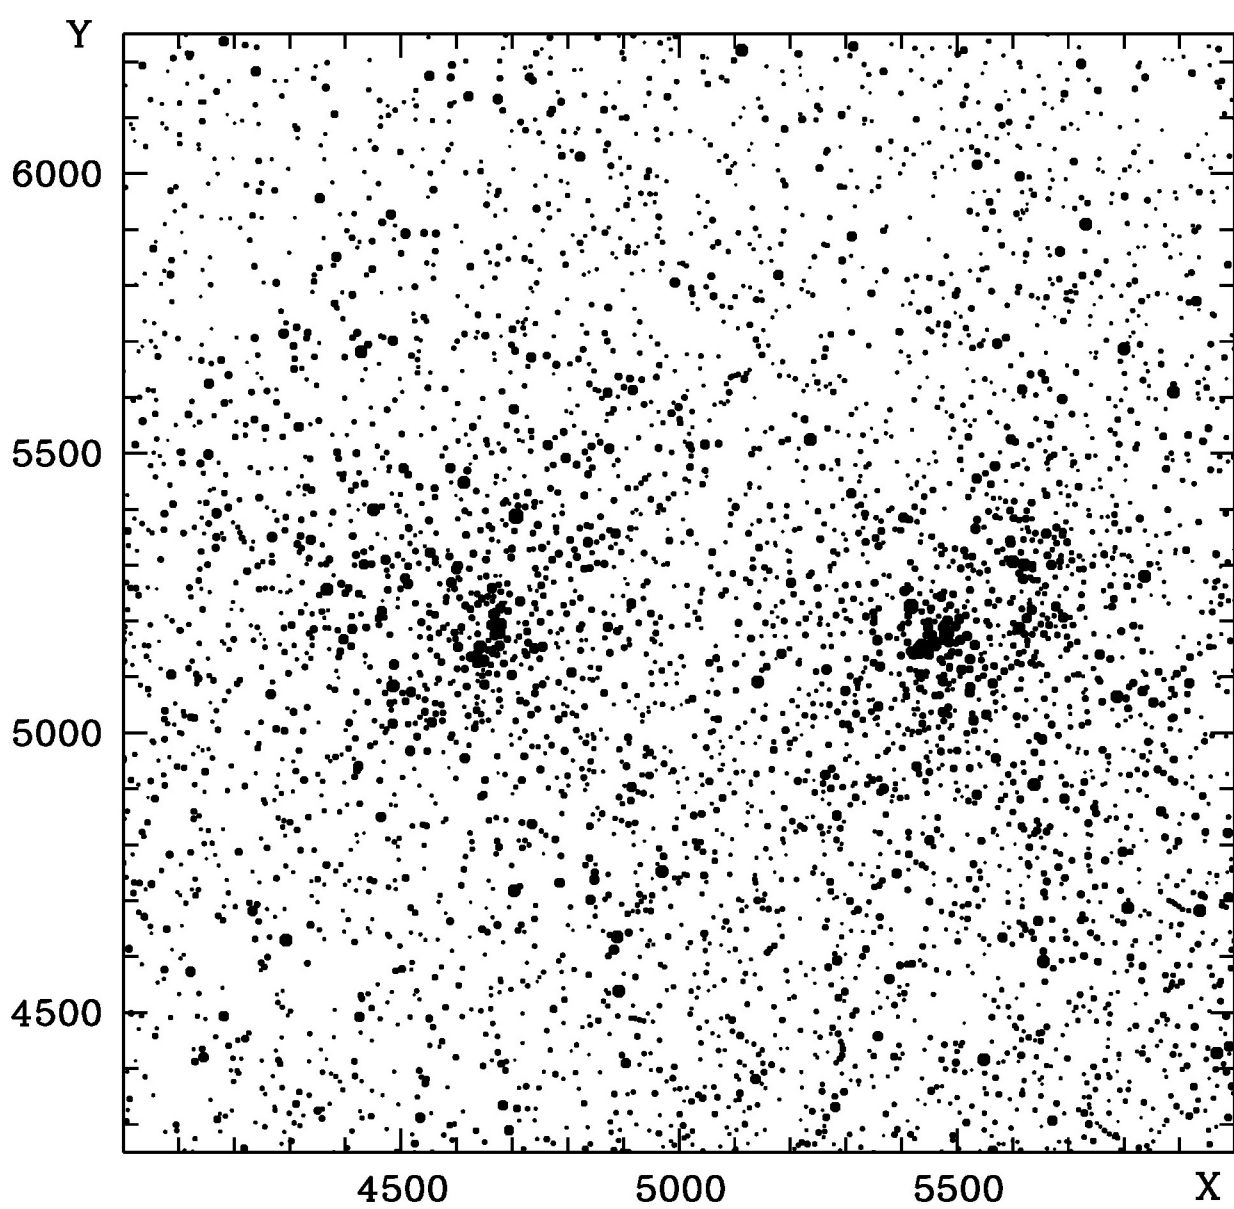

Supplement: Supplementary file 9 [file fig6x.pdf › image/fig6x.pdf]
